# Supplementary material
Source: PubMed Central journal article supplement (PMC8905075)

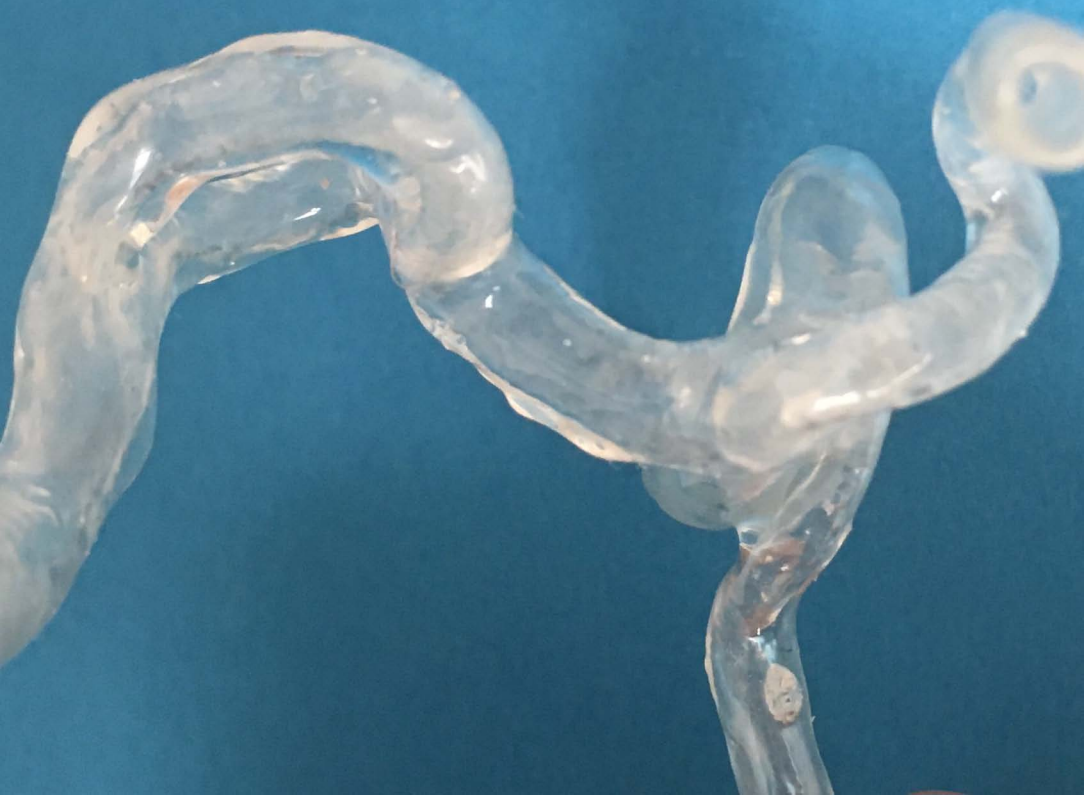

Supplement: sj-pdf-1-ine-10.1177_15910199211015060.pdf [file sj-pdf-1-ine-10.1177_15910199211015060.pdf]
